# Supplementary material
Source: publisher site journal article supplement (https://www.dovepress.com/article/586115)
Supplement: Supplementary file 1 [file 586115%20Supplementary%20file.docx]

**Table S1: ICD 10 diagnostic codes**

|  | ICD 10 Code |
| --- | --- |
| Ventricular Fibrillation | I47.x |
| Ventricular Tachycardia | I49.0 |
| III° Atrioventricular Block | I44.2 |
| Diabetes Mellitus | E10.x, E11.x, E12.x, E13.x, E14.x |
| Hypertension | I10.x, I11.x, I13.x, I14.x, I15.x |
| Atrial Fibrillation | I48.x |
| Valvular Heart Disease | I34.x, I35.x, I36.x, I37.x, I38.x, I39.x |
| Hyperlipidemia | E78.x |
| Chronic Obstructive Pulmonary Disease | J44.9 |
| Parkinson's Disease | G20.x, G21.x, G22.x, G23.x |
| Malignancy | Cx |
| Ischemic Stroke | I63.x |
| Cerebral Hemorrhage | I60.x, I61.x, I62.x |
| Renal Insufficiency | N18.x, N19.x |
| Peripheral Vascular Disease | I73.8, I73.9 |

**Table S2: Reporting checklist for cohort study: based on the STROBE cohort guidelines**

|  |  | Reporting Item | Page Number |
| --- | --- | --- | --- |
| **Title and abstract** |  |  |  |
| Title | #1a | Indicate the study’s design with a commonly used term in the title or the abstract | Page 2 |
| Abstract | #1b | Provide in the abstract an informative and balanced summary of what was done and what was found | Page 2 |
| **Introduction** |  |  |  |
| Background / rationale | #2 | Explain the scientific background and rationale for the investigation being reported | Page 3-4 |
| Objectives | #3 | State specific objectives, including any prespecified hypotheses | Page 4 |
| **Methods** |  |  |  |
| Study design | #4 | Present key elements of study design early in the paper | Page 4-5 |
| Setting | #5 | Describe the setting, locations, and relevant dates, including periods of recruitment, exposure, follow-up, and data collection | Page 4-5 |
| Eligibility criteria | #6a | Give the eligibility criteria, and the sources and methods of selection of participants. Describe methods of follow-up. | Page 4-5 |
| Eligibility criteria | #6b | For matched studies, give matching criteria and number of exposed and unexposed | Page 4-5 |
| Variables | #7 | Clearly define all outcomes, exposures, predictors, potential confounders, and effect modifiers. Give diagnostic criteria, if applicable | Page 5 |
| Data sources / measurement | #8 | For each variable of interest give sources of data and details of methods of assessment (measurement). Describe comparability of assessment methods if there is more than one group. Give information separately for for exposed and unexposed groups if applicable. | Page 5 |
| Bias | #9 | Describe any efforts to address potential sources of bias | Page 5-6 |
| Study size | #10 | Explain how the study size was arrived at | Page 4-5 |
| Quantitative variables | #11 | Explain how quantitative variables were handled in the analyses. If applicable, describe which groupings were chosen, and why | Page 5 |
| Statistical methods | #12a | Describe all statistical methods, including those used to control for confounding | Page 5-6 |
| Statistical methods | #12b | Describe any methods used to examine subgroups and interactions | Page 6 |
| Statistical methods | #12c | Explain how missing data were addressed | NA |
| Statistical methods | #12d | If applicable, explain how loss to follow-up was addressed | NA |
| Statistical methods | #12e | Describe any sensitivity analyses | Page 6 |
| **Results** |  |  |  |
| Participants | #13a | Report numbers of individuals at each stage of study—eg numbers potentially eligible, examined for eligibility, confirmed eligible, included in the study, completing follow-up, and analysed. Give information separately for for exposed and unexposed groups if applicable. | Page 7-8 |
| Participants | #13b | Give reasons for non-participation at each stage | NA |
| Participants | #13c | Consider use of a flow diagram | NA |
| Descriptive data | #14a | Give characteristics of study participants (eg demographic, clinical, social) and information on exposures and potential confounders. Give information separately for exposed and unexposed groups if applicable. | Page 7-8 |
| Descriptive data | #14b | Indicate number of participants with missing data for each variable of interest | NA |
| Descriptive data | #14c | Summarise follow-up time (eg, average and total amount) | Page 8 |
| Outcome data | #15 | Report numbers of outcome events or summary measures over time. Give information separately for exposed and unexposed groups if applicable. | Page 8 |
| Main results | #16a | Give unadjusted estimates and, if applicable, confounder-adjusted estimates and their precision (eg, 95% confidence interval). Make clear which confounders were adjusted for and why they were included | Table S3;  Figure S1 |
| Main results | #16b | Report category boundaries when continuous variables were categorized | Page 7 |
| Main results | #16c | If relevant, consider translating estimates of relative risk into absolute risk for a meaningful time period | NA |
| Other analyses | #17 | Report other analyses done—eg analyses of subgroups and interactions, and sensitivity analyses | Page 8 |
| **Discussion** |  |  |  |
| Key results | #18 | Summarise key results with reference to study objectives | Page 9 |
| Limitations | #19 | Discuss limitations of the study, taking into account sources of potential bias or imprecision. Discuss both direction and magnitude of any potential bias. | Page 12 |
| Interpretation | #20 | Give a cautious overall interpretation considering objectives, limitations, multiplicity of analyses, results from similar studies, and other relevant evidence. | Page 9-11 |
| Generalisability | #21 | Discuss the generalisability (external validity) of the study results | Page 9-11 |
| **Other Information** |  |  |  |
| Funding | #22 | Give the source of funding and the role of the funders for the present study and, if applicable, for the original study on which the present article is based | Page 13-14 |

**Table S3. Multivariable Cox Regression Analysis Based on Lasso-Selected Predictors**

| **Variable** | **Multivariate analysis** | | |
| --- | --- | --- | --- |
| **HR** | **95%*CI*** | ***p*** |
| **ADL** |  |  |  |
| Normal | ref |  |  |
| Mild Impaired | 1.21 | 1.08-1.37 | 0.001 |
| Moderate Impaired | 1.74 | 1.47-2.05 | <0.001 |
| Severe Impaired | 2.20 | 1.77-2.74 | <0.001 |
| Age | 1.07 | 1.06-1.08 | <0.001 |
| **Killip class** |  |  |  |
| I | ref |  |  |
| II | 1.60 | 1.49-1.72 | <0.001 |
| III | 3.55 | 3.31-3.81 | <0.001 |
| IV | 8.54 | 7.87-9.26 | <0.001 |
| STEMI | 0.68 | 0.64-0.72 | <0.001 |
| History of stroke | 1.29 | 1.22-1.36 | <0.001 |
| History of valvular heart disease | 1.52 | 1.32-1.75 | <0.001 |
| History of diabetes mellitus | 1.14 | 1.07-1.20 | <0.001 |

**Notes:** STEMI: ST-elevation myocardial infarction.

**Figures with Figure Legends**

**Figure S1. Impact of PCI on Clinical Outcomes in the Subgroup of Patients with Impaired ADL.**

**
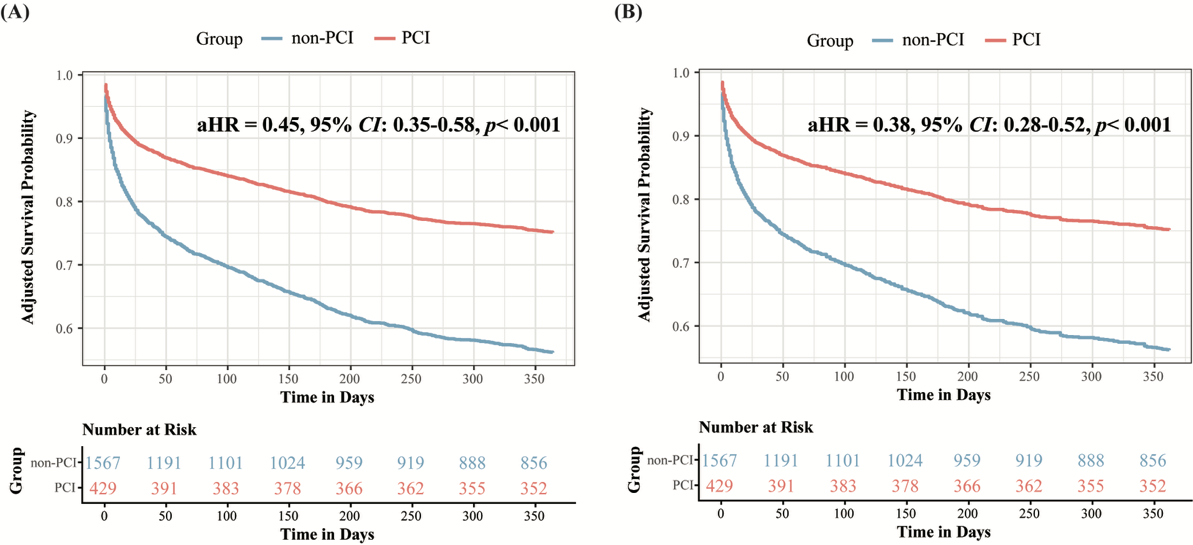
**

**Notes:** (A) All-cause Mortalities of ADL Impaired; (B) Cardiac Mortalities of ADL Impaired.

Model adjusted for gender, age, Killip class, diabetes mellitus, hypertension, atrial fibrillation, previous ischemic stroke, cerebral hemorrhage, aspirin, clopidogrel/ticagrelor, ACEIs/ARBs, β-Blockers, lipid-lowering agents, anticoagulant.

**
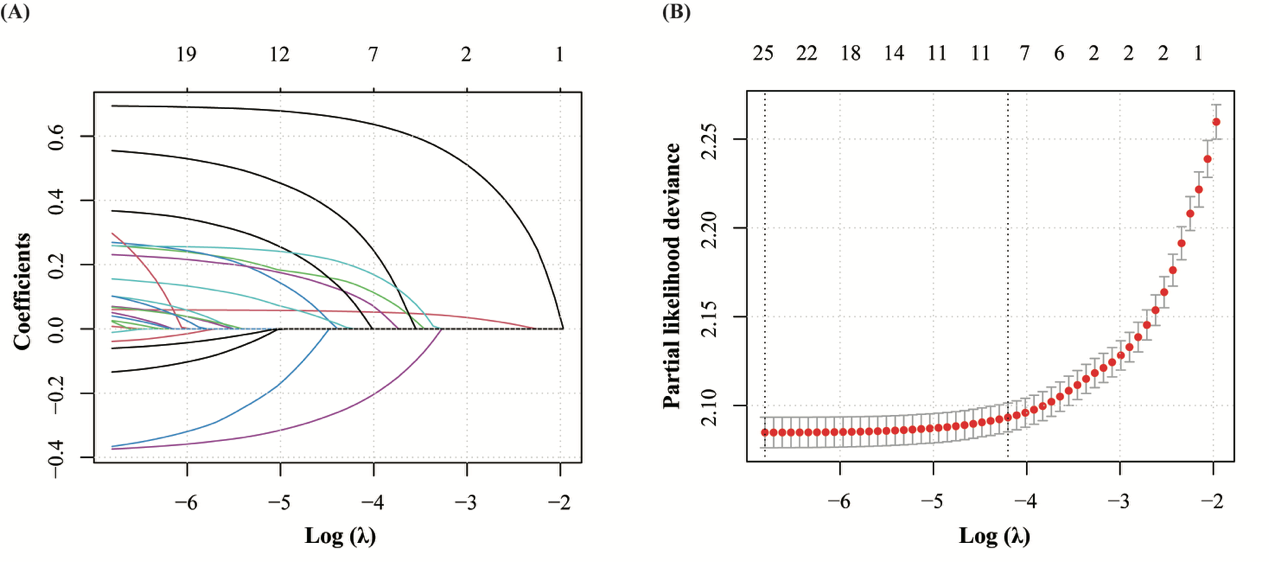
Figure S2. Selection of predictors by Lasso regression.**

**Notes:** (A) Coefficient profile plot of the potential predictors; (B) Cross-validation curve for tuning parameter (lambda) selection.

**Figure S3. Decision curve analysis (DCA) of the nomogram for predicting mortality at 3, 6, and 12 months in the training and validation cohorts.**

**
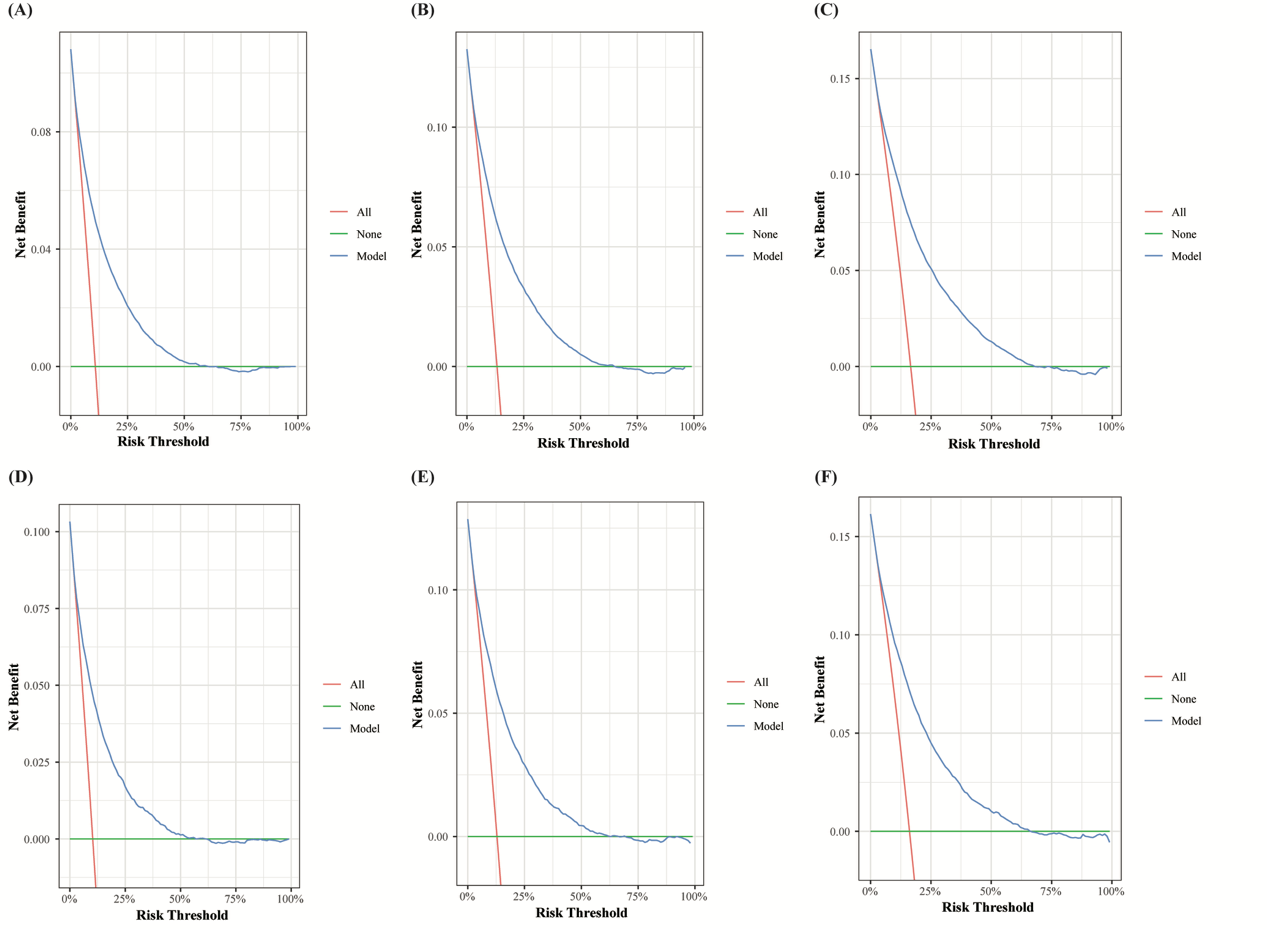
**

**Notes:** (A) DCA for Predicting 3-Month Mortality in the Training Cohort; (B) DCA for Predicting 6-Month Mortality in the Training Cohort; (C) DCA for Predicting 12-Month Mortality in the Training Cohort; (D) DCA for Predicting 3-Month Mortality in the Validation Cohort; (E) DCA for Predicting 6-Month Mortality in the Validation Cohort; (F) DCA for Predicting 12-Month Mortality in the Validation Cohort.

**
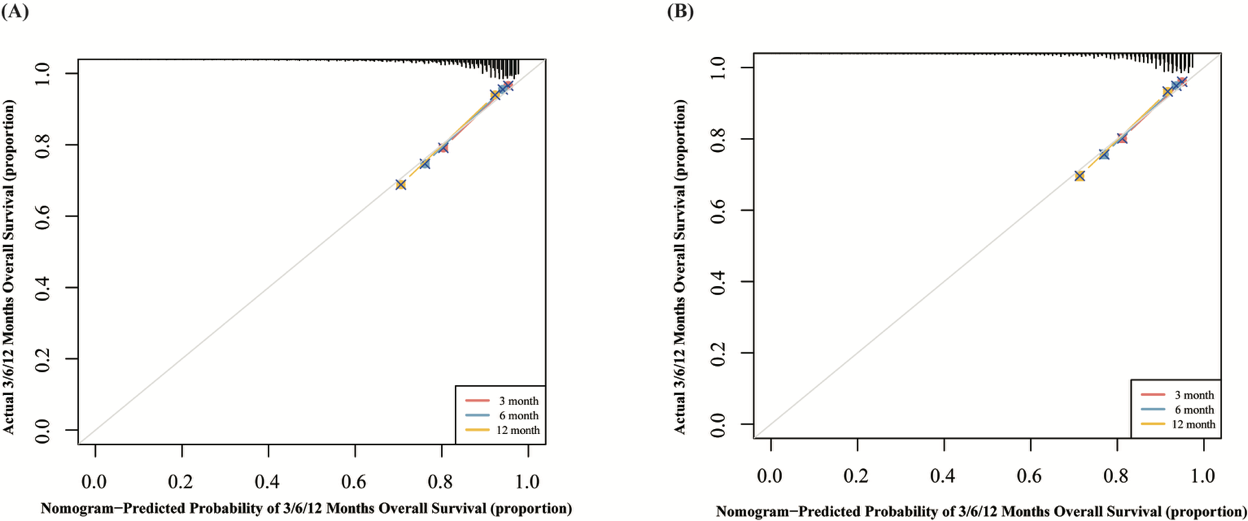
Figure S4. Calibration curve of the nomogram model at 3, 6, and 12 months in the training and validation cohorts.**

**Notes:** (A) Calibration curve of the nomogram model in the training cohorts; (B) Calibration curve of the nomogram model in the validation cohorts.

**
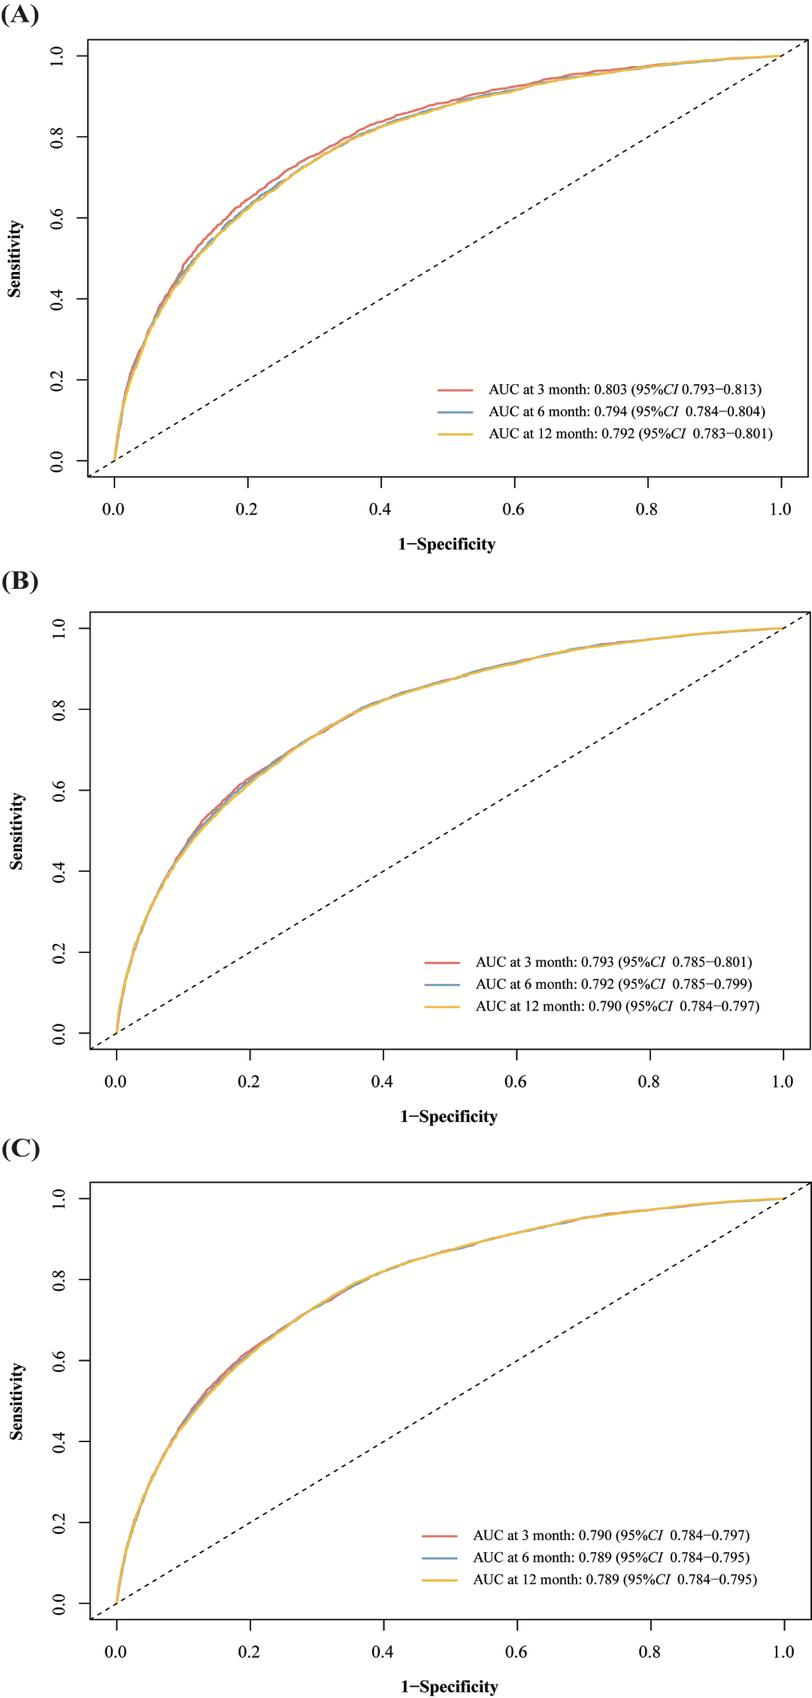
Figure S5. Sensitivity Analysis of ROC Curves by Time Interval Between ADL Assessment and AMI Admission.**

**Notes:** (A) 6-Month Time Interval Between ADL Assessment and AMI Admission;(B) 1-Year Time Interval Between ADL Assessment and AMI Admission; (C) 2-Year Time Interval Between ADL Assessment and AMI Admission.
